# Supplementary material for: Time Trends of Environmental and Socioeconomic Risk Factors in Patients with Inflammatory Bowel Disease over 40 Years: A Population-Based Inception Cohort 1977–2020
Source: MDPI journal article supplement (doi:10.3390/jcm12083026), 2023-04-21
Supplement: s1 [file s1]

## Supplementary Table S1

### Epidemiologiai vizsgálat. Kérdőív. Crohn-betegség

„A gyulladásos bélbetegségek epidemiológiájának vizsgálata gyulladásos bélbetegekben Veszprém megyében.”

Betegazonosító adatok és klinikai jellemzők

Betegazonosító: \_\_\_\_\_

|                                |                        |                               |                     |                    |
|--------------------------------|------------------------|-------------------------------|---------------------|--------------------|
| Életkor a betegség kezdetekor  | év                     |                               |                     |                    |
| Betegség fennállásának ideje   | év (diagnóziskor 0 év) |                               |                     |                    |
| Beteg életkora most            | év                     |                               |                     |                    |
| Nem                            | F                      | N                             |                     |                    |
| Lakohely                       | varos                  | falu                          |                     |                    |
| Iskolazottság                  | alapfokú               | középfokú                     | egyetem/főiskola    |                    |
| Munkakör                       | fizikai                | szellemi                      | tanuló              |                    |
| Antikoncepció (ha nő)          | igen                   | nem                           |                     |                    |
| Appendectomy a diagnózis előtt | igen                   | nem                           |                     |                    |
| Familiaris anamnézis           | igen                   | Nem                           |                     |                    |
|                                | UC                     |                               | CD                  |                    |
|                                | Elsőfokú               | Másodfokú                     | Elsőfokú            | Másodfokú          |
| Dohányzás a diagnóziskor       | <15                    | ≥15                           | régen               | nem                |
| Dohányzás változás             | igen                   | nem                           | mikor?              | most mennyi?       |
| Lokalizáció                    | L1                     | L2                            | L3                  | L4                 |
| Viselkedése, típusa            | B1                     | B2                            | B3                  | B3-4               |
| Viselkedés változása           | igen                   | nem                           | mikor?              | Új behavior:       |
| Aktivitás (CDAI, HBI)          |                        | Ekkor CRP-thrombocyták száma? |                     |                    |
| Perianalis szövődmény          | igen                   | Nem                           |                     |                    |
| Gyakori relapsus               | igen                   | Nem                           | évente hány?        |                    |
| Extraintestinalis: arthritis   | igen                   | Nem                           |                     |                    |
| Peripheriás                    | igen                   | Nem                           |                     |                    |
| Axiális (sacroileitis, SNSA)   | igen                   | Nem                           |                     |                    |
| Extraintestinalis: máj         | igen                   | Nem                           |                     |                    |
| PSC, Pericholangitis           | igen                   | Nem                           |                     |                    |
| AIH                            | igen                   | Nem                           |                     |                    |
| NAFLD                          | igen                   | Nem                           |                     |                    |
| Extraintestinalis: szem        | igen                   | Nem                           | Melyik?             |                    |
| Extraintestinalis: bőr         | igen                   | Nem                           | Melyik?             |                    |
| Terápia                        |                        |                               |                     |                    |
| ASA                            | salazopyrin            | mesalasin                     | Egyéb:              |                    |
| Mennyi ideig?                  | Év                     |                               |                     |                    |
| Milyen dózisban                | <2 g                   |                               | ≥2 g                |                    |
| Steroid                        | igen                   | Nem                           | Ha igen: refracter  | Ha igen: dependens |
| Mennyi ideig?                  | Év                     |                               |                     |                    |
| Azathioprin                    | igen                   | Nem                           | Ha igen: refracter  | Ha igen: dependens |
| Mennyi ideig?                  | Év                     |                               |                     |                    |
| Dózis?                         | <50 mg                 | 50-75 mg                      | ≥100 mg             |                    |
| Egyéb immunuszuppresszív       | nem                    | Igen: cyclosporin             | Igen: methothrexat  |                    |
| Biológiai terápia? mikor?      | Igen                   | Nem                           | Ha igen: infliximab | Egyéb:             |
| kezelés hatékonysága           | remisszió              | response                      | nem reagált         | szövődmény         |

| Resectios műtétek száma                   | 0    | 1       | 2-3 | >3 |
|-------------------------------------------|------|---------|-----|----|
| Műtétig eltelt idő (hónap a diagnózistól) | első | második |     |    |

**Értelmezés: Betegazonosító jel:** centrum betűjele / sorszám az adott centrumban / név kezdőbetűk, Pl: V/1/NI  
(Veszprém/1. beteg/Nagy István)

**Lokalizáció:** L1: ileum L2: colon L3: ileocolicus L4: felső GI tractus

**Behavior:** B1: gyulladásos, B2: stenotizáló, B3: penetráló B3-4: stenotizáló és penetráló

**Gyakori relapsus:** 2 éven belül 2x (CDAI >150),

**Extraintest. arthritis:** axialis (sacroileitis, SNSA) és peripheriás („colitises”) arthritisek (P1= nagy ízület (térd, váll), P2 = kis ízület (kéztő, stb.), **Extraintest. szem:** uveitis, iritis, conjunctivitis, **Extraintest. bőr:** erythema nodosum, pyoderma gangraenosum, **Extraintestinális máj:** PSC, pericholangitis, AIH, NAFLD

## Epidemiológiai vizsgálat. Kérdőív. Colitis ulcerosa

„A gyulladásos bélbetegségek epidemiológiájának vizsgálata gyulladásos bélbetegekben Veszprém megyében.”

Betegazonosító adatok és klinikai jellemzők

Betegazonosító: \_\_\_\_\_

|                                |           |                        |                    |                     |                            |
|--------------------------------|-----------|------------------------|--------------------|---------------------|----------------------------|
| Életkor a betegség kezdetekor  |           | év                     |                    |                     |                            |
| Betegség fennállásának ideje   |           | év (diagnóziskor 0 év) |                    |                     |                            |
| Beteg életkora most            |           | év                     |                    |                     |                            |
| Nem                            |           | F                      | N                  |                     |                            |
| Lakohely                       |           | varos                  | falu               |                     |                            |
| Iskolazottság                  |           | alapfokú               | középfokú          | egyetem/főiskola    |                            |
| Munkakör                       |           | fizikai                | szellemi           | tanuló              |                            |
| Antikoncepció (ha nő)          |           | igen                   | nem                |                     |                            |
| Appendectomy a diagnózis előtt |           | igen                   | nem                |                     |                            |
| Familiaris anamnesis           |           | igen                   | Nem                |                     |                            |
|                                |           | UC                     |                    | CD                  |                            |
|                                |           | Elsőfokú               | Másodfokú          | Elsőfokú            | Másodfokú                  |
| Dohányzás a diagnóziskor       |           | <15                    | ≥15                | régen               | nem                        |
| Dohányzás változás             |           | igen                   | nem                | mikor?              | most mennyi?               |
| Lokalizáció                    | Proctitis | Procto-sigmoiditis     | Bal oldali colitis | Subtotalis colitis  | Pancolitis                 |
| Lefolyás                       |           | Remittáló              |                    |                     | chr. continuus             |
| Aktivitás (Mayo-TW index)      |           |                        |                    |                     | Ekkor CRP-thrombocytaszám? |
|                                |           | Gyakori relapsus       | Ritka relapsus     | évente hány?        |                            |
| Extraintestinalis: arthritis   |           | igen                   | Nem                | Egyéb:              |                            |
| Peripheriás                    |           | igen                   | Nem                |                     |                            |
| Axiális (sacroileitis, SNSA)   |           | igen                   | Nem                |                     |                            |
| Extraintestinalis: máj         |           | igen                   | Nem                |                     |                            |
| PSC, Pericholangitis           |           | igen                   | Nem                |                     |                            |
| AIH                            |           | igen                   | Nem                |                     |                            |
| NAFLD                          |           | igen                   | Nem                |                     |                            |
| Extraintestinalis: szem        |           | igen                   | Nem                | Melyik?             |                            |
| Extraintestinalis: bőr         |           | igen                   | Nem                | Melyik?             |                            |
| Terápia                        |           |                        |                    |                     |                            |
| ASA                            |           | salazopyrin            | mesalasin          | Egyéb:              |                            |
| Mennyi ideig?                  |           | Év                     |                    |                     |                            |
| Milyen dózisban                |           | <2 g                   |                    | ≥2 g                |                            |
| Steroid                        |           | igen                   | Nem                | Ha igen: refracter  | Ha igen: dependens         |
| Mennyi ideig?                  |           | Év                     |                    |                     |                            |
| Azathioprin                    |           | igen                   | Nem                | Ha igen: refracter  | Ha igen: dependens         |
| Mennyi ideig?                  |           | Év                     |                    |                     |                            |
| Dózis?                         |           | <50 mg                 | 50-75 mg           | ≥100 mg             |                            |
| Biológiai terápia? mikor?      |           | Igen                   | Nem                | Ha igen: infliximab | Egyéb:                     |
| kezelés hatékonysága           |           | remisszió              | response           | nem reagált         | szövődmény                 |
| Egyéb immunszuppresszív        |           | nem                    | Igen: cyclosporin  | Igen: methothrexat  | Igen: egyéb                |
| Colectomia                     |           | igen                   | Nem                |                     |                            |
| Mikor (hónap a diagnózistól)   |           |                        |                    |                     |                            |

**Értelmezés: Betegazonosító jel:** centrum betűjele / sorszám az adott centrumban / név kezdőbetűk, P1:  
V/1/NI (Veszprém/1. beteg/Nagy István)

**Gyakori relapsus:** 2 éven belül 2x (CDAI >150),

**Extraintest. Arthritis:** axialis (sacroileitis, SNSA) és peripheriás („colitises”) arthritisek (P1= nagy ízület (térd, váll), P2 = kis ízület (kéztő, stb.), **Extraintest. Szem:** uveitis, iritis, conjunctivitis, **Extraintest. Bőr:** erythema nodosum, pyoderma gangraenosum, **Extraintestinális máj:** PSC, pericholangitis, AIH, NAFLD
