# Supplementary material for: Time Trends of Environmental and Socioeconomic Risk Factors in Patients with Inflammatory Bowel Disease over 40 Years: A Population-Based Inception Cohort 1977–2020
Source: MDPI journal article supplement (doi:10.3390/jcm12083026), 2023-04-21
Supplement: s1 [file s1]

**Supplemental Table S2** Differences in environmental and socio-economic factors between the incident UC and CD patients stratified by the eras of diagnosis

| Factors                                                                 | Cohort A      |                  |                            | Cohort B          |                   |                            | Cohort C          |                   |                            |
|-------------------------------------------------------------------------|---------------|------------------|----------------------------|-------------------|-------------------|----------------------------|-------------------|-------------------|----------------------------|
|                                                                         | UC<br>(n=331) | CD<br>(n=128)    | <i>p</i> -<br><i>value</i> | UC<br>(n=605)     | CD<br>(n=379)     | <i>p</i> -<br><i>value</i> | UC<br>(n=434)     | CD<br>(n=363)     | <i>p</i> -<br><i>value</i> |
| <b>Current Smoking at diagnosis</b>                                     | 51 (15.4%)    | 77 (60.2%)       | <0.001                     | 93(15.4%)         | 189 (49.9%)       | <0.001                     | 63(14.5%)         | 140(38.6%)        | <0.001                     |
| <b>Appendectomy before diagnosis</b>                                    | 21 (6.3%)     | 35 (27.3%)       | <0.001                     | 33 (5.5%)         | 54 (14.2%)        | <0.001                     | 10(2.3%)          | 25(6.9%)          | 0.003                      |
| <b>Current Contraceptive use at diagnosis</b> *% counted only in female | 15/165(9.1%)  | 18/76(23.7<br>%) | 0.004                      | 40/281(14.2<br>%) | 53/199(26.6<br>%) | 0.001                      | 21/211(10.0<br>%) | 40/169(23.7<br>%) | <0.001                     |
| <b>Physical workers</b>                                                 | 168 (50.8%)   | 73 (57.0%)       | 0.737                      | 320 (52.9%)       | 185(48.8%)        | 0.232                      | 175(40.3%)        | 163 (44.9%)       | 0.173                      |
| <b>Urban living area</b>                                                | 198 (59.8%)   | 80 (62.5%)       | 0.670                      | 391 (64.6%)       | 235 (62.0%)       | 0.376                      | 270(62.2%)        | 214 (59.0%)       | 0.308                      |
| <b>Primary school</b>                                                   | 112 (33.8%)   | 36 (28.1%)       | 0.181                      | 148 (24.5%)       | 68 (17.9%)        | 0.016                      | 60(13.8%)         | 33 (9.1%)         | 0.043                      |
| <b>High school/college</b>                                              | 142 (42.9%)   | 63 (49.2%)       | 0.342                      | 304 (50.2%)       | 196 (51.7%)       | 0.354                      | 216 (51.6%)       | 196 (59.5%)       | 0.034                      |
| <b>University</b>                                                       | 59 (17.8%)    | 26 (20.3%)       | 0.688                      | 109 (18.0%)       | 67(17.6%)         | 0.931                      | 62(14.3%)         | 58 (16.0%)        | 0.477                      |
